# Supplementary material for: Membrane Topology Mapping of the O-Antigen Flippase (Wzx), Polymerase (Wzy), and Ligase (WaaL) from Pseudomonas aeruginosa PAO1 Reveals Novel Domain Architectures
Source: PubMed Central journal article supplement — mBio. 2010 Aug 24;1(3):e00189-10. doi: 10.1128/mBio.00189-10 (PMC2932511; doi:10.1128/mbio.00189-10), 2010-08-24
Supplement: mBio00189-10-sf06.pdf [file mBio00189-10-sf06.pdf]

**Figure S6.**

PL3 : ----AGYFSFDFAAGQY-ARRALAREVFAAGSANGYLSISIGTQAFFPV- : 42  
PL5 : GALEHEVFGYSFLNDYFLRRAFIVPSTLLGAVDQFVSQFCSNYRDTL : 48
