# Supplementary material for: Membrane Topology Mapping of the O-Antigen Flippase (Wzx), Polymerase (Wzy), and Ligase (WaaL) from Pseudomonas aeruginosa PAO1 Reveals Novel Domain Architectures
Source: PubMed Central journal article supplement — mBio. 2010 Aug 24;1(3):e00189-10. doi: 10.1128/mBio.00189-10 (PMC2932511; doi:10.1128/mbio.00189-10), 2010-08-24
Supplement: mBio00189-10-st01.pdf [file mBio00189-10-st01.pdf]

**Table S1.** Normalized activities of AP and BG Wzx truncation fusions to PhoALacZ $\alpha$ 

| Residue <sup>a</sup> | Avg AP <sup>b</sup> | Avg BG <sup>c</sup> | %AP <sup>d</sup> | %BG <sup>e</sup> | NAR <sup>f</sup><br>(%AP÷%BG) | Colony Colour <sup>g</sup> | Localization <sup>h</sup> |
|----------------------|---------------------|---------------------|------------------|------------------|-------------------------------|----------------------------|---------------------------|
| <i>Random</i>        |                     |                     |                  |                  |                               |                            |                           |
| T27                  | 147.6               | 19.4                | 31.8             | 19.0             | 1.67                          | Purple                     | TM                        |
| R32                  | 464.8               | 9.1                 | 100.0            | 8.9              | 11.23                         | Blue                       | P                         |
| S43                  | 459.4               | 0.2                 | 98.8             | 0.2              | >100                          | Blue                       | P                         |
| F65                  | -1.6                | 19.1                | -0.3             | 18.7             | <0.01                         | Red                        | C                         |
| G71                  | -3.2                | 16.1                | -0.7             | 15.7             | <0.01                         | Red                        | C                         |
| I80                  | 0                   | 49.2                | 0.0              | 48.0             | <0.01                         | Red                        | C                         |
| H100                 | 113.7               | 0.2                 | 24.5             | 0.2              | >100                          | Blue                       | P                         |
| L133                 | -2.0                | 82.2                | -0.4             | 80.3             | <0.01                         | Red                        | C                         |
| V158                 | 168.1               | 45.0                | 36.2             | 44.0             | 0.82                          | Purple                     | TM                        |
| N196                 | -2.6                | 41.3                | -0.6             | 40.4             | <0.01                         | Red                        | C                         |
| W202                 | 10.4                | 95.3                | 2.2              | 93.1             | 0.02                          | Red                        | C                         |
| R203                 | 2.5                 | 48.9                | 0.5              | 47.8             | 0.01                          | Purple                     | C                         |
| V208                 | 0.5                 | 47.3                | 0.1              | 46.2             | <0.01                         | Red                        | C                         |
| S219                 | -0.3                | 90.1                | -0.1             | 88.0             | <0.01                         | Red                        | C                         |
| S230                 | -1.3                | 53.1                | -0.3             | 51.8             | <0.01                         | Red                        | C                         |
| I235                 | -1.1                | 72.8                | -0.2             | 71.1             | <0.01                         | Red                        | C                         |
| G242                 | -1.7                | 23.2                | -0.4             | 22.7             | <0.01                         | Red                        | C                         |
| G287                 | -4.5                | 29.6                | -1.1             | 29.4             | <0.01                         | Red                        | C                         |
| <i>Targeted</i>      |                     |                     |                  |                  |                               |                            |                           |
| W113                 | 8.0                 | -4.4                | 1.6              | -0.8             | >100                          | Blue                       | P                         |
| S138                 | -3.9                | 10.8                | -0.8             | 2.0              | <0.01                         | Red                        | C                         |
| S168                 | 156.8               | -5.3                | 31.9             | -1.0             | >100                          | Blue                       | P                         |
| V178                 | 491.3               | 28.9                | 100.0            | 5.4              | 18.46                         | Blue                       | P                         |
| Y212                 | -6.1                | 34.5                | -1.2             | 6.4              | <0.01                         | Red                        | C                         |
| L251                 | 7.9                 | 37.7                | 1.6              | 7.1              | 0.23                          | Purple                     | TM                        |
| D269                 | 25.9                | 15.4                | 5.3              | 2.9              | 1.83                          | Purple                     | TM                        |
| A276                 | 3.1                 | 26.4                | 0.6              | 4.9              | 0.13                          | Purple                     | TM                        |
| F304                 | 46.2                | 12.8                | 9.4              | 2.4              | 3.94                          | Purple                     | TM                        |
| G311                 | 13.8                | -7.4                | 2.8              | -1.4             | >100                          | Blue                       | P                         |
| G316                 | 14.0                | -8.8                | 2.9              | -1.6             | >100                          | Blue                       | P                         |
| V318                 | 22.9                | 54.5                | 4.7              | 10.2             | 0.46                          | Purple                     | TM                        |
| E325                 | 5.9                 | 0.9                 | 1.2              | 0.2              | 7.21                          | Purple                     | TM                        |
| M339                 | -0.5                | 4.0                 | -0.1             | 0.7              | <0.01                         | Red                        | C                         |
| L346                 | 0.2                 | 534.3               | 0.0              | 100.0            | <0.01                         | Red                        | C                         |
| F374                 | 6.3                 | -2.4                | 1.3              | -0.4             | >100                          | Blue                       | P                         |
| D381                 | 158.3               | -1.9                | 32.2             | -0.4             | >100                          | Blue                       | P                         |
| S402                 | -2.8                | 2.5                 | -0.6             | 0.5              | <0.01                         | Red                        | C                         |
| K411                 | -2.9                | 18.4                | -0.6             | 3.4              | <0.01                         | Red                        | C                         |

As purpose-built truncations had higher absolute activities than random truncations, the two sets were normalized independently against the maximum activity within the respective subset of residues.

<sup>a</sup> Position of the terminal amino acid of Wzx followed by reporter.

<sup>b</sup> and <sup>c</sup> AP and BG activities of the fusions in Miller units, measured as described in Materials and Methods; average of four independent experiments.

<sup>d</sup> and <sup>e</sup> Percentage of AP and BG activities of the fusions in relation to the maximum measured activity within the set, calculated separately for targeted and random truncations.

<sup>f</sup> Normalized %AP ÷ %BG activity ratio (NAR), rounded to two decimal places.

<sup>g</sup> Colony colour of expressed clone on dual-indicator plate.

<sup>h</sup> Localization of terminal amino acid on the topology map: periplasm (P), cytoplasm (C), transmembrane (TM).
