# Supplementary material for: Membrane Topology Mapping of the O-Antigen Flippase (Wzx), Polymerase (Wzy), and Ligase (WaaL) from Pseudomonas aeruginosa PAO1 Reveals Novel Domain Architectures
Source: PubMed Central journal article supplement — mBio. 2010 Aug 24;1(3):e00189-10. doi: 10.1128/mBio.00189-10 (PMC2932511; doi:10.1128/mbio.00189-10), 2010-08-24
Supplement: mBio00189-10-st02.pdf [file mBio00189-10-st02.pdf]

**Table S2.** Normalized activities of AP and BG Wzy truncation fusions to PhoALacZ $\alpha$ 

| Residue <sup>a</sup> | Avg AP <sup>b</sup> | Avg BG <sup>c</sup> | %AP <sup>d</sup> | %BG <sup>e</sup> | NAR <sup>f</sup><br>(%AP÷%BG) | Colony Colour <sup>g</sup> | Localization <sup>h</sup> |
|----------------------|---------------------|---------------------|------------------|------------------|-------------------------------|----------------------------|---------------------------|
| <i>Random</i>        |                     |                     |                  |                  |                               |                            |                           |
| N29                  | 22.1                | 1.6                 | 44.7             | 24.3             | 1.84                          | Purple                     | TM                        |
| I33                  | 33.4                | -2.5                | 67.8             | -37.3            | >100                          | Blue                       | P                         |
| S42                  | 36.2                | -1.3                | 73.4             | -19.4            | >100                          | Blue                       | P                         |
| C66                  | -1.0                | 3.0                 | -2.1             | 44.6             | <0.01                         | Red                        | C                         |
| V91                  | 39.2                | -2.0                | 79.6             | -30.6            | >100                          | Blue                       | P                         |
| S99                  | 48.1                | -1.8                | 97.6             | -26.7            | >100                          | Blue                       | P                         |
| W105                 | 28.6                | -0.2                | 58.0             | -2.8             | >100                          | Blue                       | P                         |
| L130                 | -1.0                | 3.8                 | -2.1             | 57.9             | <0.01                         | Red                        | C                         |
| F165                 | 26.3                | 0.3                 | 53.3             | 4.7              | 11.34                         | Blue                       | P                         |
| A177                 | 49.3                | -0.7                | 100.0            | -10.9            | >100                          | Blue                       | P                         |
| A188                 | 41.6                | -1.9                | 84.5             | -28.7            | >100                          | Blue                       | P                         |
| S194                 | 29.8                | -1.1                | 60.4             | -16.5            | >100                          | Blue                       | P                         |
| R211                 | 4.9                 | 1.4                 | 9.9              | 21.2             | 0.46                          | Purple                     | TM                        |
| L219                 | -5.3                | 5.0                 | -10.7            | 76.0             | <0.01                         | Red                        | C                         |
| F231                 | 18.4                | 1.6                 | 37.2             | 23.8             | 1.56                          | Purple                     | TM                        |
| V238                 | 41.3                | -0.2                | 83.8             | -3.1             | >100                          | Blue                       | P                         |
| V256                 | -5.9                | 3.5                 | -11.9            | 52.1             | <0.01                         | Red                        | C                         |
| F279                 | 34.6                | -2.8                | 70.2             | -42.1            | >100                          | Blue                       | P                         |
| N285                 | 24.1                | -0.1                | 48.9             | -0.8             | >100                          | Blue                       | P                         |
| D286                 | 28.1                | 0.2                 | 57.0             | 3.0              | 19.00                         | Blue                       | P                         |
| P296                 | 34.7                | -2.7                | 70.4             | -40.9            | >100                          | Blue                       | P                         |
| L300                 | 34.8                | -8.0                | 70.5             | -121.4           | >100                          | Blue                       | P                         |
| F306                 | 10.6                | -3.5                | 21.4             | -53.1            | >100                          | Purple                     | P                         |
| E339                 | -2.5                | 3.5                 | -5.0             | 52.9             | <0.01                         | Red                        | C                         |
| F341                 | -1.1                | 2.4                 | -2.2             | 35.8             | <0.01                         | Red                        | C                         |
| L378                 | -2.8                | 2.5                 | -5.7             | 37.8             | <0.01                         | Red                        | C                         |
| L382                 | -3.7                | 2.7                 | -7.5             | 40.2             | <0.01                         | Red                        | C                         |
| G387                 | -3.9                | 3.5                 | -7.9             | 53.2             | <0.01                         | Red                        | C                         |
| A395                 | -3.0                | 6.6                 | -6.1             | 100.0            | <0.01                         | Red                        | C                         |
| T399                 | 11.8                | 1.3                 | 23.8             | 19.1             | 1.25                          | Purple                     | TM                        |
| G415                 | 10.5                | 1.3                 | 21.3             | 19.0             | 1.12                          | Purple                     | TM                        |
| <i>Targeted</i>      |                     |                     |                  |                  |                               |                            |                           |
| R135                 | 0.0                 | 120.1               | 0.0              | 100.0            | <0.01                         | Red                        | C                         |
| S147                 | -2.7                | 50.8                | -2.9             | 42.3             | <0.01                         | Red                        | C                         |
| G311                 | 78.7                | 4.0                 | 83.5             | 3.3              | 25.37                         | Purple                     | P                         |
| R316                 | 88.1                | 5.5                 | 93.5             | 4.6              | 20.33                         | Purple                     | P                         |
| G321                 | 44.7                | 94.7                | 47.5             | 78.9             | 0.60                          | Purple                     | TM                        |
| L323                 | 8.1                 | 19.2                | 8.6              | 16.0             | 0.54                          | Purple                     | TM                        |
| R335                 | 25.3                | 21.5                | 26.9             | 17.9             | 1.50                          | Purple                     | TM                        |
| D345                 | 21.2                | 17.4                | 22.5             | 14.5             | 1.55                          | Purple                     | TM                        |
| Q359                 | 23.1                | -1.9                | 24.6             | -1.6             | >100                          | Purple                     | P                         |
| V365                 | 3.6                 | 3.8                 | 3.9              | 3.2              | 1.22                          | Purple                     | TM                        |
| M419                 | 94.2                | 1.3                 | 100.0            | 1.0              | 100                           | Purple                     | P                         |
| L438                 | 1.0                 | 21.7                | 0.0              | 100.0            | <0.01                         | Red                        | C                         |

As purpose-built truncations had higher absolute activities than random truncations, the two sets were normalized independently against the maximum activity within the respective subset of residues.

<sup>a</sup> Position of the terminal amino acid of Wzy followed by reporter.

<sup>b</sup> and <sup>c</sup> AP and BG activities of the fusions in Miller units, measured as described in Materials and Methods; average of four independent experiments.

<sup>d</sup> and <sup>e</sup> Percentage of AP and BG activities of the fusions in relation to the maximum measured activity within the set, calculated separately for targeted and random truncations.

<sup>f</sup> Normalized %AP ÷ %BG activity ratio (NAR), rounded to two decimal places.

<sup>g</sup> Colony colour of expressed clone on dual-indicator plate.

<sup>h</sup> Localization of terminal amino acid on the topology map: periplasm (P), cytoplasm (C), transmembrane (TM).
