# Supplementary material for: Membrane Topology Mapping of the O-Antigen Flippase (Wzx), Polymerase (Wzy), and Ligase (WaaL) from Pseudomonas aeruginosa PAO1 Reveals Novel Domain Architectures
Source: PubMed Central journal article supplement — mBio. 2010 Aug 24;1(3):e00189-10. doi: 10.1128/mBio.00189-10 (PMC2932511; doi:10.1128/mbio.00189-10), 2010-08-24
Supplement: mBio00189-10-st03.pdf [file mBio00189-10-st03.pdf]

**Table S3.** Normalized activities of AP and BG WaaL truncation fusions to PhoALacZ $\alpha$ 

| Residue <sup>a</sup> | Avg AP <sup>b</sup> | Avg BG <sup>c</sup> | %AP <sup>d</sup> | %BG <sup>e</sup> | NAR <sup>f</sup><br>(%AP÷%BG) | Colony Colour <sup>g</sup> | Localization <sup>h</sup> |
|----------------------|---------------------|---------------------|------------------|------------------|-------------------------------|----------------------------|---------------------------|
| <i>Random</i>        |                     |                     |                  |                  |                               |                            |                           |
| R40                  | 170.9               | 0.0                 | 90.5             | 0.1              | >100                          | Blue                       | P                         |
| R64                  | -4.1                | 4.7                 | -2.2             | 14.9             | <0.01                         | Red                        | C                         |
| M86                  | 189.0               | -1.6                | 100.0            | -5.0             | >100                          | Blue                       | P                         |
| L135                 | 125.2               | -1.3                | 66.3             | -4.0             | >100                          | Blue                       | P                         |
| L157                 | -1.8                | 5.6                 | -1.0             | 17.8             | <0.01                         | Red                        | C                         |
| S169                 | -2.7                | 5.8                 | -1.4             | 18.6             | <0.01                         | Red                        | C                         |
| S198                 | 68.5                | 2.4                 | 36.3             | 7.8              | 4.64                          | Purple                     | TM                        |
| L199                 | 63.6                | 1.2                 | 33.7             | 3.9              | 8.55                          | Purple                     | TM                        |
| L206                 | 56.1                | 0.5                 | 29.7             | 1.7              | 17.24                         | Blue                       | P                         |
| A208                 | 78.3                | 2.0                 | 41.4             | 6.4              | 6.46                          | Purple                     | TM                        |
| L225                 | 10.8                | 2.4                 | 5.7              | 7.8              | 0.73                          | Purple                     | TM                        |
| G229                 | 65.0                | 1.3                 | 34.4             | 4.2              | 8.15                          | Purple                     | TM                        |
| K233                 | 15.4                | 2.8                 | 8.2              | 9.0              | 0.90                          | Purple                     | TM                        |
| I256                 | 31.6                | 3.1                 | 16.7             | 10.0             | 1.67                          | Purple                     | TM                        |
| R259                 | 162.0               | -2.4                | 85.7             | -7.7             | >100                          | Blue                       | P                         |
| S262                 | 110.0               | -1.0                | 58.2             | -3.3             | >100                          | Blue                       | P                         |
| W280                 | 64.8                | -1.6                | 34.3             | -5.0             | >100                          | Blue                       | P                         |
| P302                 | 38.9                | -1.2                | 20.6             | -3.9             | >100                          | Blue                       | P                         |
| L307                 | 34.3                | 4.2                 | 18.2             | 13.4             | 1.36                          | Purple                     | TM                        |
| K334                 | -1.1                | 2.8                 | -0.6             | 8.9              | <0.01                         | Red                        | C                         |
| G359                 | 174.8               | -4.7                | 92.5             | -15.1            | >100                          | Blue                       | P                         |
| D397                 | -3.6                | 31.3                | -1.9             | 100              | <0.01                         | Red                        | C                         |
| <i>Targeted</i>      |                     |                     |                  |                  |                               |                            |                           |
| A178                 | -4.2                | 5.5                 | -7.2             | 14.7             | <0.01                         | Red                        | C                         |
| W180                 | -2.4                | 2.4                 | -4.1             | 6.4              | <0.01                         | Red                        | C                         |
| F371                 | 58.8                | 23.0                | 100.0            | 61.6             | 1.62                          | Purple                     | TM                        |
| P401                 | -3.5                | 37.3                | -6.0             | 100.0            | <0.01                         | Red                        | C                         |

As purpose-built truncations had higher absolute activities than random truncations, the two sets were normalized independently against the maximum activity within the respective subset of residues.

<sup>a</sup> Position of the terminal amino acid of WaaL followed by reporter.

<sup>b</sup> and <sup>c</sup> AP and BG activities of the fusions in Miller units, measured as described in Materials and Methods; average of four independent experiments.

<sup>d</sup> and <sup>e</sup> Percentage of AP and BG activities of the fusions in relation to the maximum measured activity within the set, calculated separately for targeted and random truncations.

<sup>f</sup> Normalized %AP ÷ %BG activity ratio (NAR), rounded to two decimal places.

<sup>g</sup> Colony colour of expressed clone on dual-indicator plate.

<sup>h</sup> Localization of terminal amino acid on the topology map: periplasm (P), cytoplasm (C), transmembrane (TM).
