# Supplementary material for: Membrane Topology Mapping of the O-Antigen Flippase (Wzx), Polymerase (Wzy), and Ligase (WaaL) from Pseudomonas aeruginosa PAO1 Reveals Novel Domain Architectures
Source: PubMed Central journal article supplement — mBio. 2010 Aug 24;1(3):e00189-10. doi: 10.1128/mBio.00189-10 (PMC2932511; doi:10.1128/mbio.00189-10), 2010-08-24
Supplement: mBio00189-10-st04.pdf [file mBio00189-10-st04.pdf]

**Table S4.** Protein sequence motifs identified in this study

| Protein      | Motif        | Residue Range (Location)              | Description (Possible Role)                                     |
|--------------|--------------|---------------------------------------|-----------------------------------------------------------------|
| <b>Wzx</b>   | RHLIESMPVVIG | 99 – 110 (PL2 <sub>x</sub> )          | RX <sub>10</sub> G (O-Ag subunit recognition)                   |
|              | GTLGA        | 15 – 19 (TMS X1)                      | GAS <sub>Right</sub> (TMS dimerization/packing)                 |
|              | ATIFA        | 49 – 53 (TMS X2)                      | GAS <sub>Right</sub> (TMS dimerization/packing)                 |
|              | AVAIA        | 90 – 94 (TMS X3)                      | GAS <sub>Right</sub> (TMS dimerization/packing)                 |
|              | ALAVA        | 115 – 119 (TMS X4)                    | GAS <sub>Right</sub> (TMS dimerization/packing)                 |
|              | AACIA        | 150 – 154 (TMS X5)                    | GAS <sub>Right</sub> (TMS dimerization/packing)                 |
|              | ATALA        | 181 – 185 (TMS X6)                    | GAS <sub>Right</sub> (TMS dimerization/packing)                 |
|              | ALWVG        | 186 – 190 (TMS X6)                    | GAS <sub>Right</sub> (TMS dimerization/packing)                 |
|              | GDSAG        | 243 – 247 (TMS X7)                    | GAS <sub>Right</sub> (TMS dimerization/packing)                 |
|              | AGWFA        | 246 – 250 (TMS X7)                    | GAS <sub>Right</sub> (TMS dimerization/packing)                 |
|              | GEAWA        | 320 – 324 (TMS X10)                   | GAS <sub>Right</sub> (TMS dimerization/packing)                 |
|              | AWAFS        | 322 – 326 (TMS X10)                   | GAS <sub>Right</sub> (TMS dimerization/packing)                 |
|              | SGRYA        | 326 – 330 (TMS X10)                   | GAS <sub>Right</sub> (TMS dimerization/packing)                 |
|              | SIAYA        | 388 – 392 (TMS X12)                   | GAS <sub>Right</sub> (TMS dimerization/packing)                 |
| <b>Wzy</b>   | RENQGRMLVLLS | 135 – 147 (CL2 <sub>y</sub> )         | <u>R/KXXXGXXXL</u> hhhhD (Walker B ATPase consensus)            |
|              | RRALAREVFAAG | 175 – 186 (PL2 <sub>y</sub> )         | RX <sub>10</sub> G (O-Ag subunit recognition)                   |
|              | RRAFIVPSTLLG | 290 – 301 (PL5 <sub>y</sub> )         | RX <sub>10</sub> G (O-Ag subunit recognition)                   |
|              | AFFSA        | 20 – 24 (TMS Y1)                      | GAS <sub>Right</sub> (TMS dimerization/packing)                 |
|              | ALICA        | 59 – 63 (TMS Y2)                      | GAS <sub>Right</sub> (TMS dimerization/packing)                 |
|              | GVPLA        | 107 – 111 (TMS Y4)                    | GAS <sub>Right</sub> (TMS dimerization/packing)                 |
|              | AIAFG        | 111 – 115 (TMS Y4)                    | GAS <sub>Right</sub> (TMS dimerization/packing)                 |
|              | GIVNA        | 220 – 224 (TMS Y7)                    | GAS <sub>Right</sub> (TMS dimerization/packing)                 |
|              | GALLG        | 321 – 325 (TMS Y10)                   | GAS <sub>Right</sub> (TMS dimerization/packing)                 |
|              | SMLVG        | 369 – 373 (TMS Y12)                   | GAS <sub>Right</sub> (TMS dimerization/packing)                 |
|              | <b>WaaL</b>  | TGYG                                  | 158 – 161 (CL3 <sub>L</sub> )                                   |
| RQISEHPWLGHG |              | 273 – 284 (PL5 <sub>L</sub> )         | RX <sub>10</sub> G (O-Ag subunit recognition)                   |
| HNIELGVLFAGG |              | 303 – 314 (PL5 <sub>L</sub> -TMS L10) | HX <sub>10</sub> G (Required for O-Ag ligation to lipid A-core) |
| ALLTG        |              | 29 – 33 (TMS L1)                      | GAS <sub>Right</sub> (TMS dimerization/packing)                 |
| AAILA        |              | 115 – 119 (TMS L5)                    | GAS <sub>Right</sub> (TMS dimerization/packing)                 |
| GAVIS        |              | 136 – 140 (TMS L6)                    | GAS <sub>Right</sub> (TMS dimerization/packing)                 |
| AVISA        |              | 137 – 141 (TMS L6)                    | GAS <sub>Right</sub> (TMS dimerization/packing)                 |
| GLTAA        |              | 217 – 221 (TMS L8)                    | GAS <sub>Right</sub> (TMS dimerization/packing)                 |
| ALALA        |              | 239 – 243 (TMS L9)                    | GAS <sub>Right</sub> (TMS dimerization/packing)                 |
| GVLFA        |              | 308 – 312 (TMS L10)                   | GAS <sub>Right</sub> (TMS dimerization/packing)                 |
| GGIIG        |              | 313 – 317 (TMS L10)                   | GAS <sub>Right</sub> (TMS dimerization/packing)                 |
| AVLLA        |              | 340 – 344 (TMS L11)                   | GAS <sub>Right</sub> (TMS dimerization/packing)                 |
| GLAAG        |              | 351 – 355 (TMS L11)                   | GAS <sub>Right</sub> (TMS dimerization/packing)                 |
| ALLYA        |              | 378 – 382 (TMS L12)                   | GAS <sub>Right</sub> (TMS dimerization/packing)                 |

Underline represents consensus sequence match with given sequence. Cytoplasmic loop (CL), periplasmic loop (PL). Subscript <sub>x</sub>, <sub>y</sub>, <sub>L</sub> denotes Wzx, Wzy, WaaL, respectively.
