# Supplementary figures and images for: Membrane Topology Mapping of the O-Antigen Flippase (Wzx), Polymerase (Wzy), and Ligase (WaaL) from Pseudomonas aeruginosa PAO1 Reveals Novel Domain Architectures
Source: PubMed Central journal article supplement — mBio. 2010 Aug 24;1(3):e00189-10. doi: 10.1128/mBio.00189-10 (PMC2932511; doi:10.1128/mbio.00189-10), 2010-08-24

Figure S1.

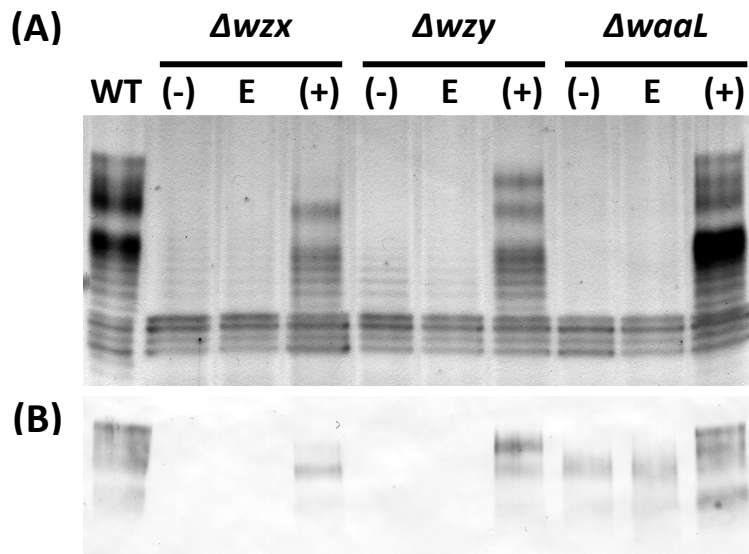

Supplement: mBio00189-10-sf01.pdf [file mBio00189-10-sf01.pdf]

**Figure S2.**

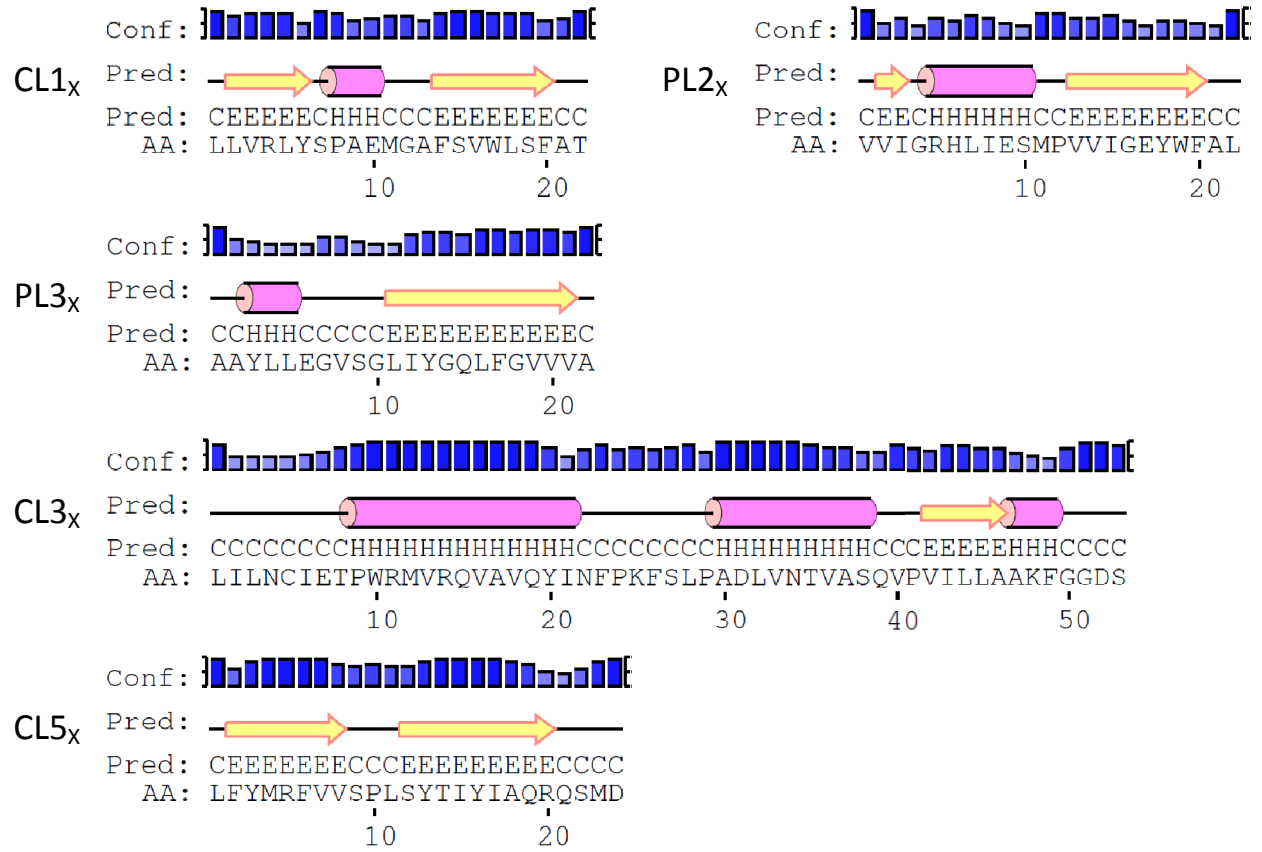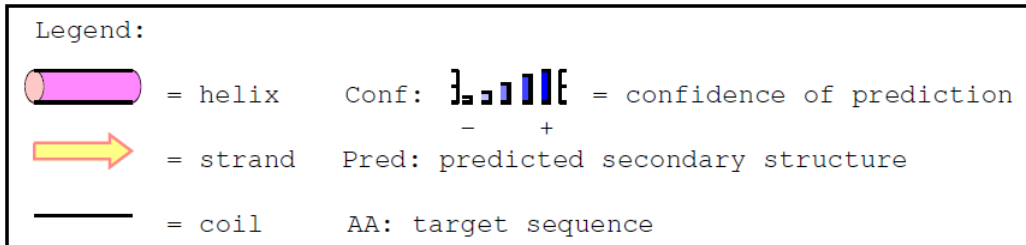

Supplement: mBio00189-10-sf02.pdf [file mBio00189-10-sf02.pdf]

**Figure S3.**

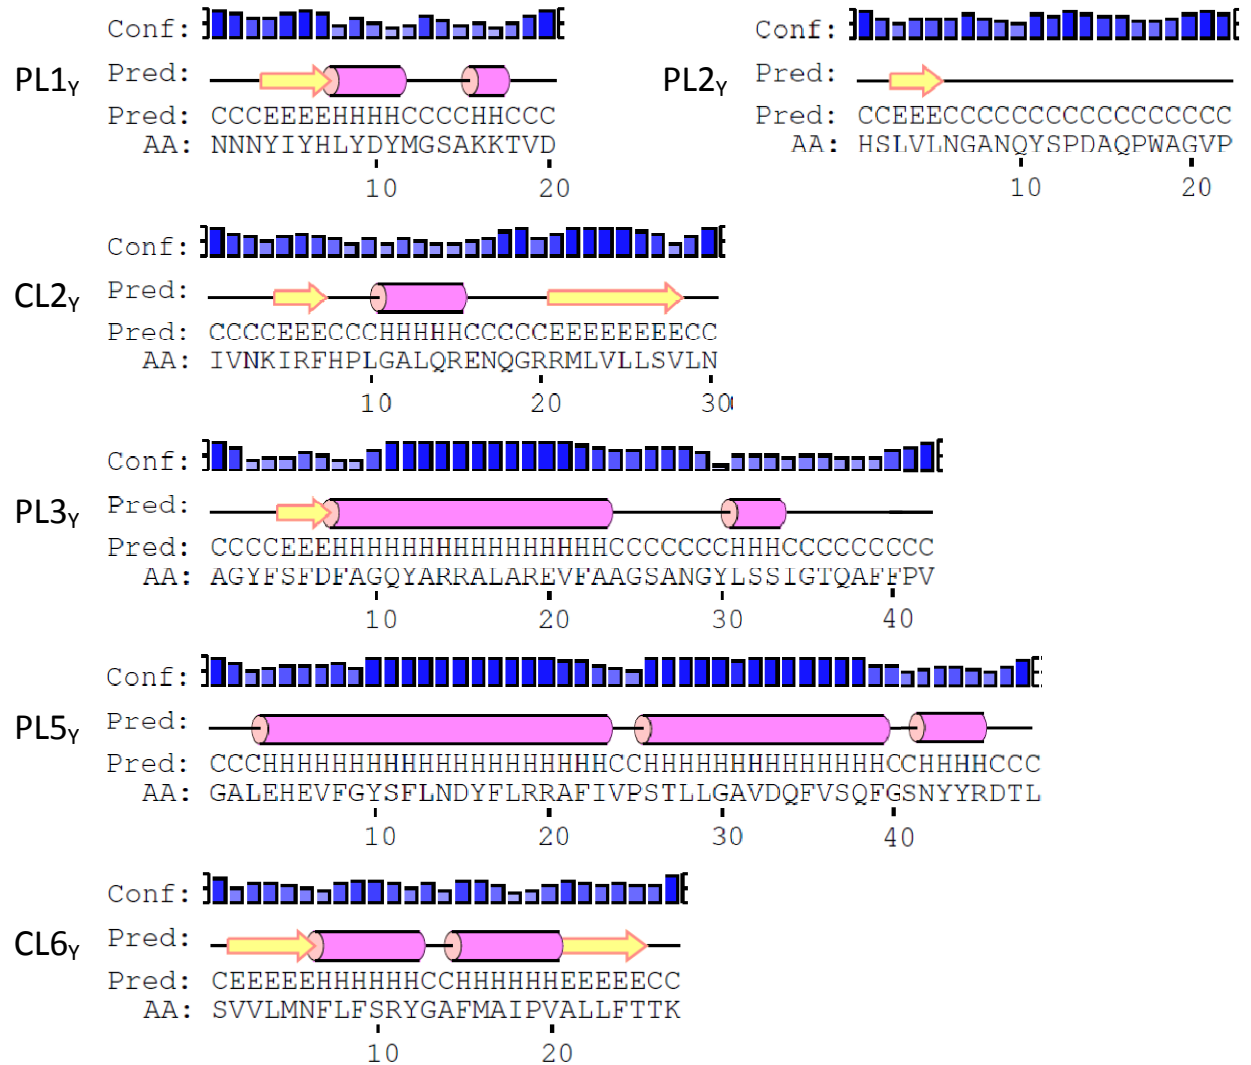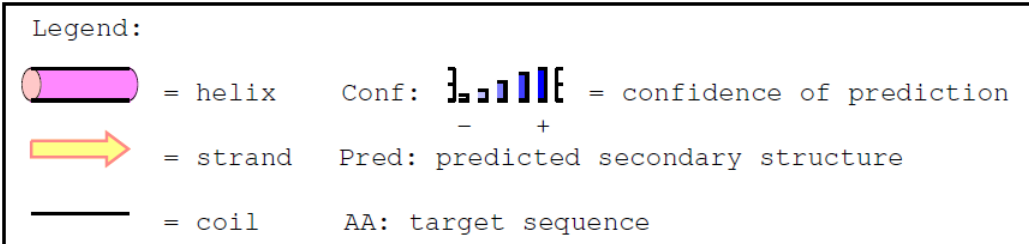

Supplement: mBio00189-10-sf03.pdf [file mBio00189-10-sf03.pdf]

**Figure S4.**

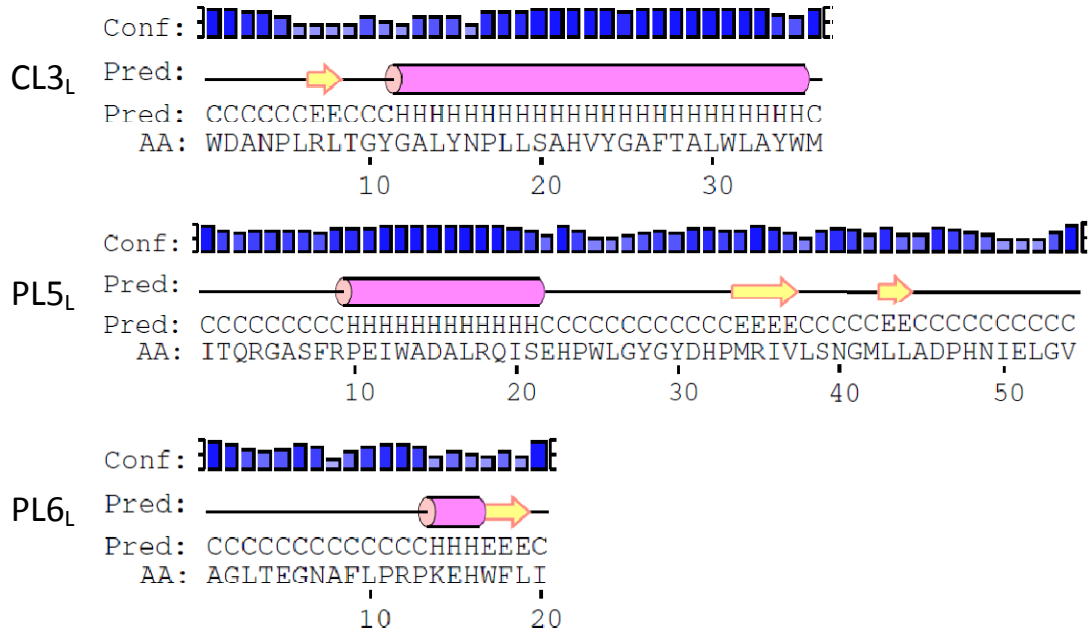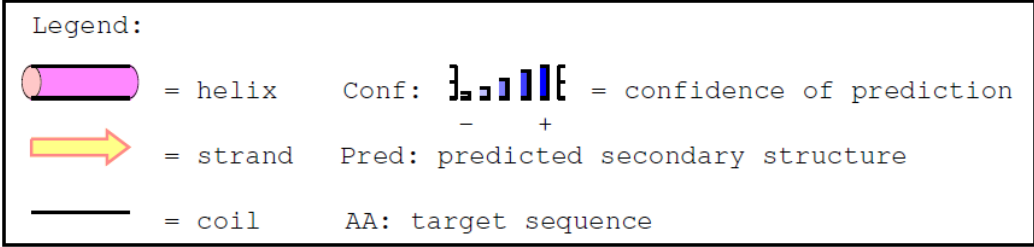

Supplement: mBio00189-10-sf04.pdf [file mBio00189-10-sf04.pdf]

Figure S5.

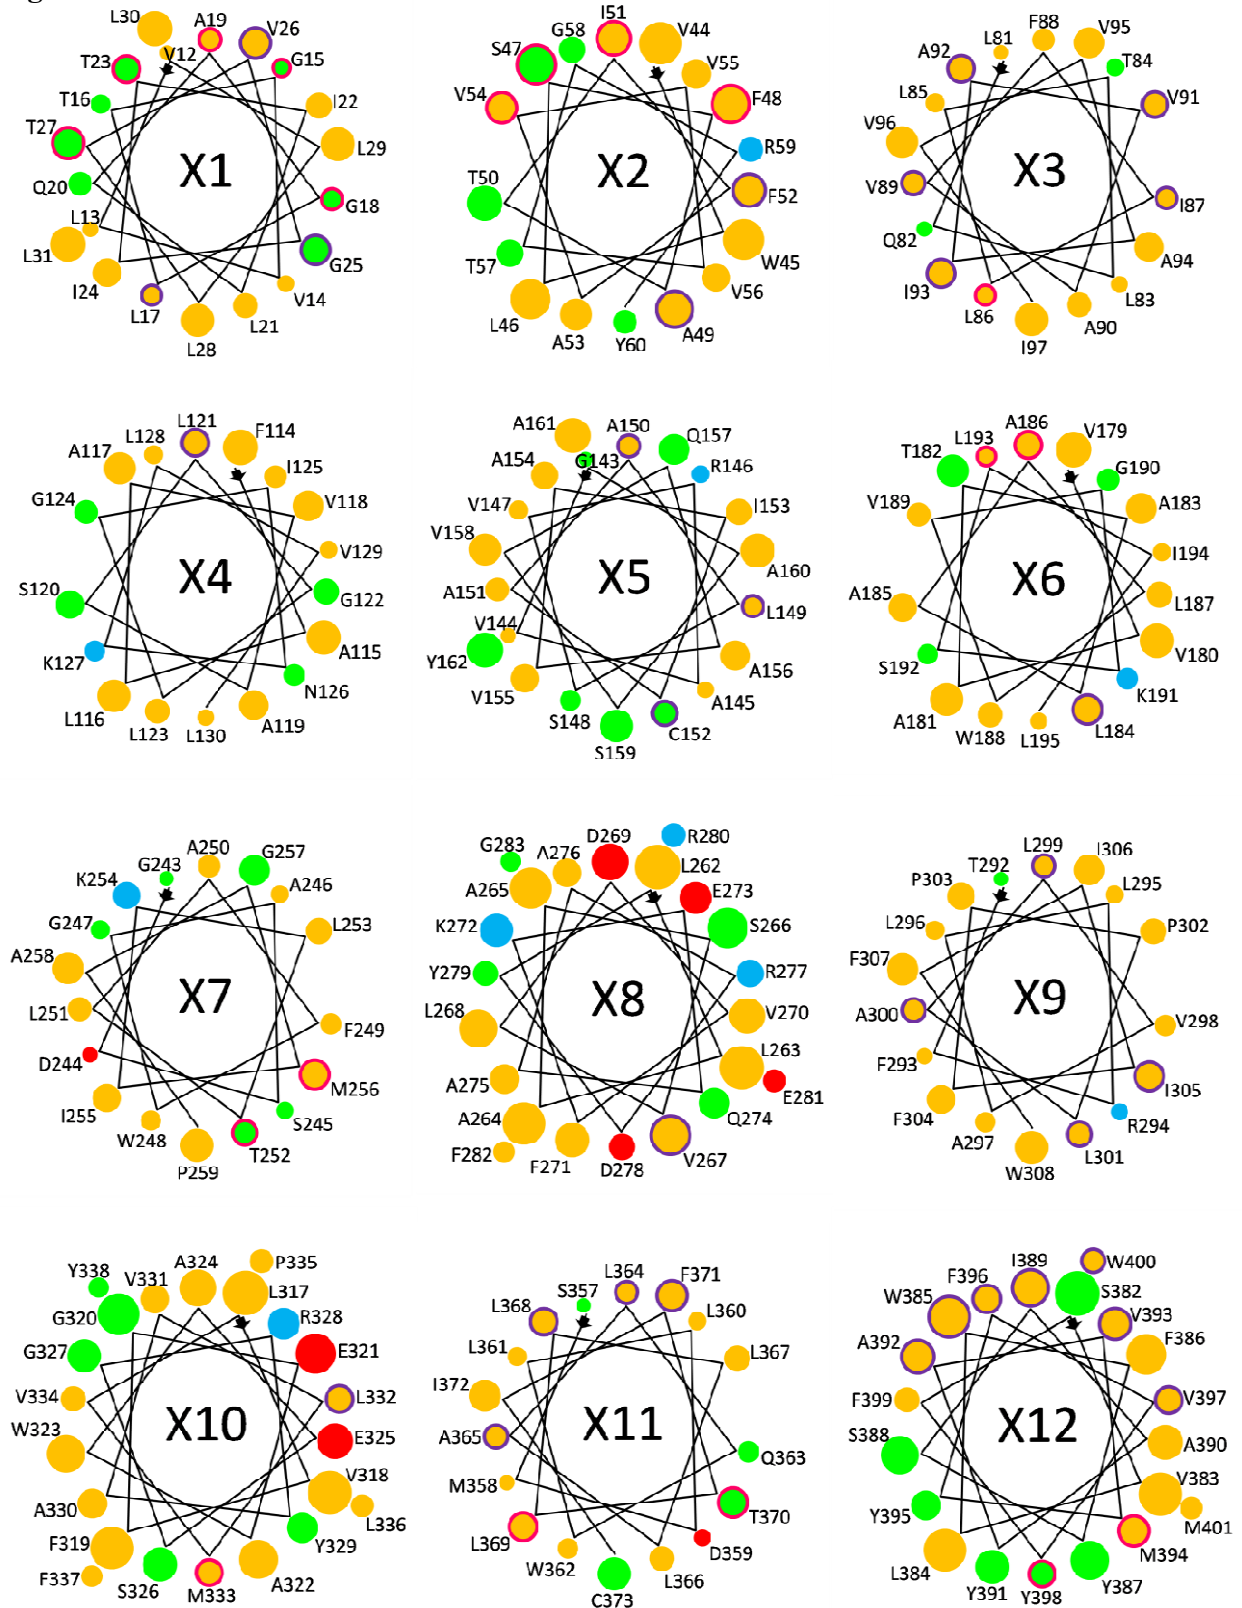

Supplement: mBio00189-10-sf05.pdf [file mBio00189-10-sf05.pdf]
